# Supplementary material for: Multiple target three-dimensional coordinate estimation for bistatic MIMO radar with uniform linear receive array
Source: Springer Nature journal article supplement (doi:10.1186/1687-6180-2013-81), 2013-04-17
Supplement: 13634_2012_451_MOESM9_ESM.pdf [file 13634_2012_451_MOESM9_ESM.pdf]

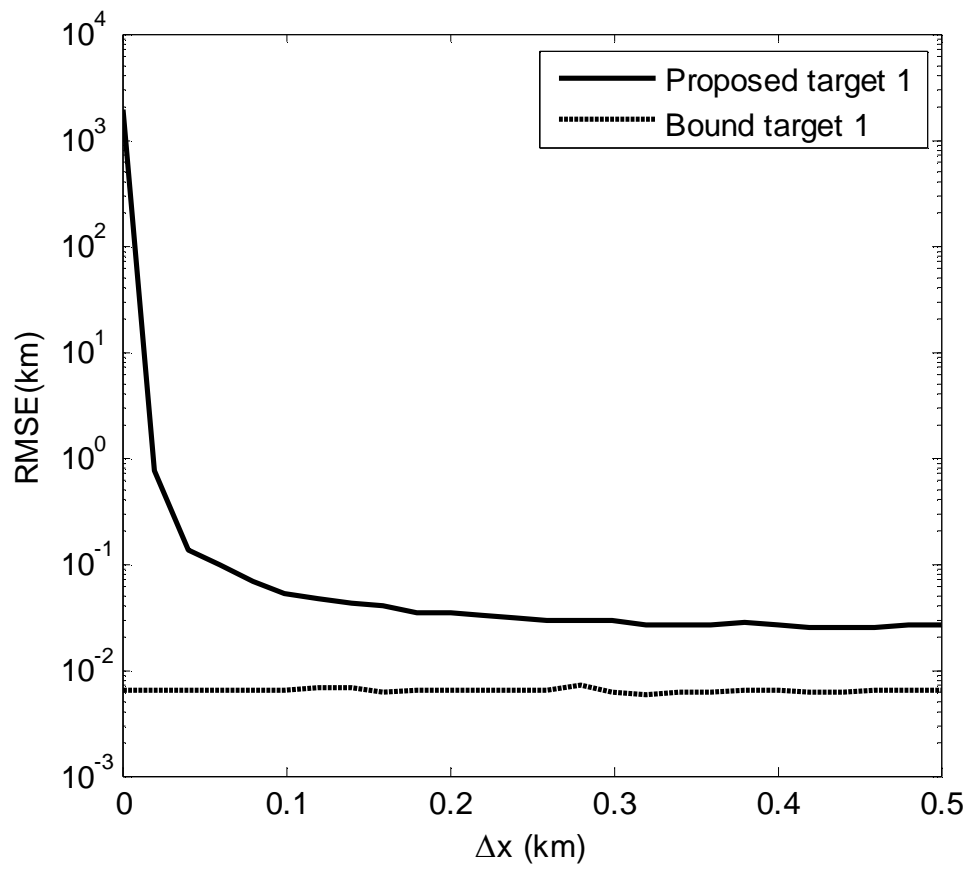

Figure 5 (b)
